# Supplementary material for: Elucidation of the Natural Function of Sophorolipids Produced by Starmerella bombicola
Source: MDPI journal article supplement (doi:10.3390/jof7110917), 2021-10-28
Supplement: s1 [file s1]

# Supplementary information: tables and figures

## Elucidation of the Natural Function of Sophorolipids Produced by *Starmerella bombicola*

Veerle De Clercq <sup>†</sup>, Sophie L. K. W. Roelants <sup>\*,†</sup>, Martijn G. Castelein, Sofie L. De Maeseneire and Wim K. Soetaert

Centre for Industrial Biotechnology and Biocatalysis (InBio.be), Department of Biotechnology, Faculty of Bioscience Engineering, Ghent University, Coupure Links 653, 9000 Ghent, Belgium;  
veedcler.DeClercq@UGent.be (V.D.C.); Martijn.Castelein@UGent.be (M.G.C.);  
Sofie.DeMaeseneire@UGent.be (S.L.D.M.); Wim.Soetaert@UGent.be (W.K.S.)

\* Correspondence: Sophie.Roelants@UGent.be; Tel.: +32-9-264-93-85

† These authors contributed equally to this work.

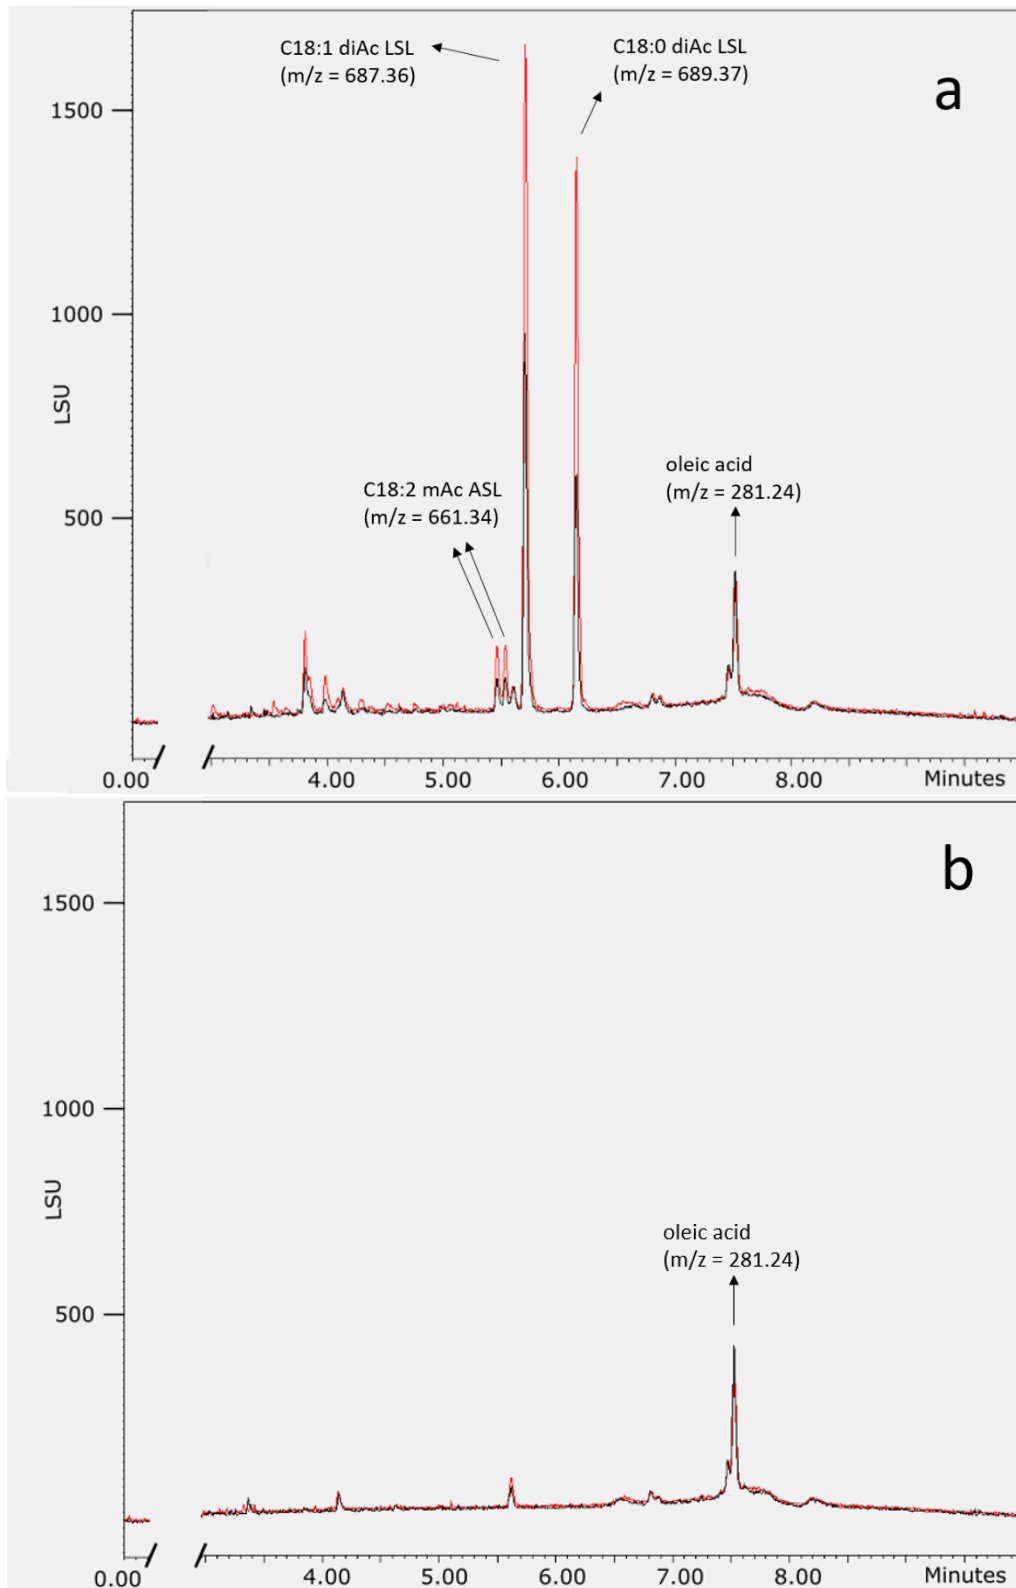

**Figure S1.** UPLC-ELSD chromatograms of the culture broth after 60 h of cultivation of **(a)** the *S. bombicola* wild-type strain **(b)** and the *S. bombicola*  $\Delta cyp52M1$  strain. The black chromatogram corresponds to the SD CSM medium with 120 g·L<sup>-1</sup> glucose and red chromatogram to the SD CSM medium with 120 g·L<sup>-1</sup> fructose. UPLC-MS was used to detect the masses and identify the corresponding peaks.

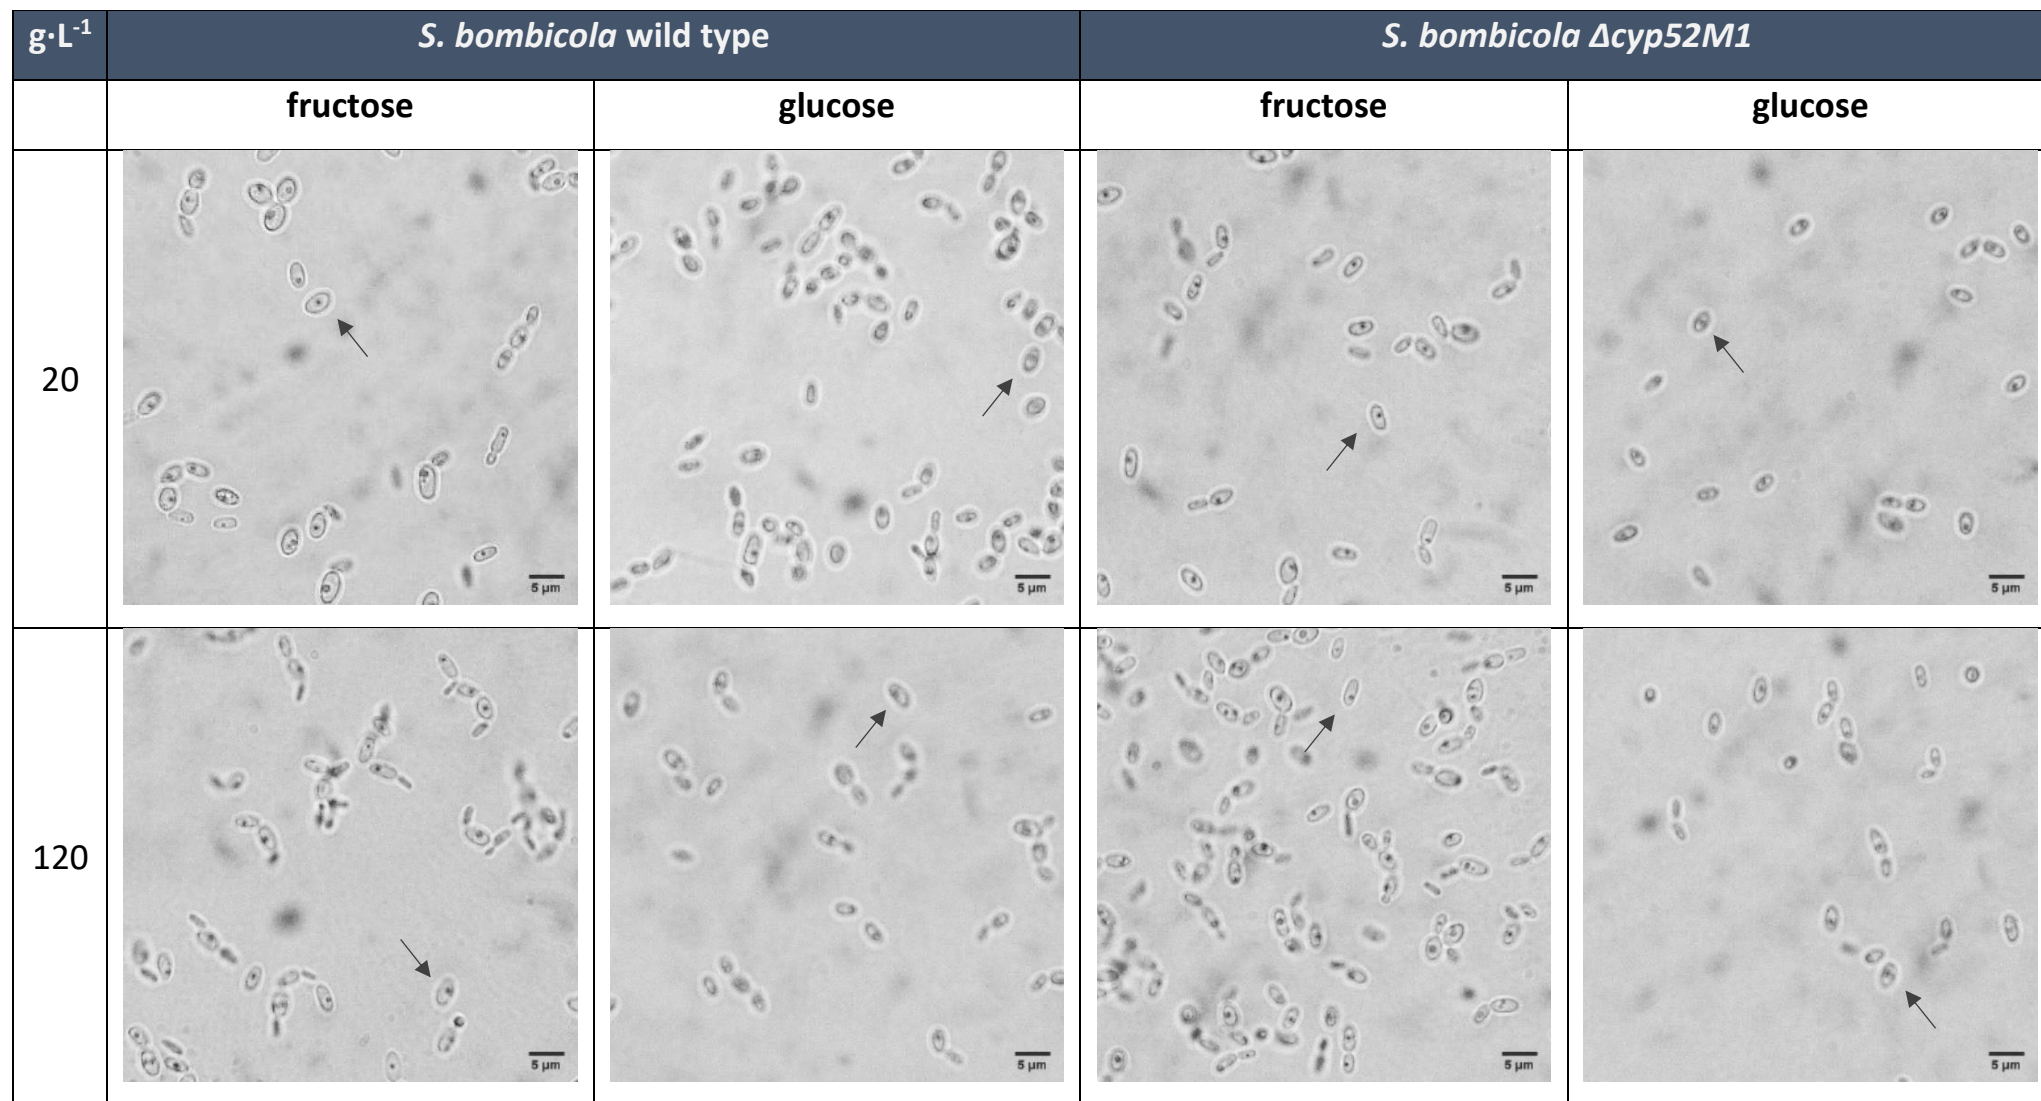

**Figure S2.** Light microscopic observations of a *S. bombicola* wild-type and a  $\Delta\text{cyp52M1}$  strain that were cultivated for 60 h on the SD CSM medium with 20, 120 and 400  $\text{g}\cdot\text{L}^{-1}$  fructose or glucose. The scale bar corresponds to 5  $\mu\text{m}$  and some cells are pointed out with an arrow.

|     |                                                                                   |                                                                                    |                                                                                     |                                                                                     |
|-----|-----------------------------------------------------------------------------------|------------------------------------------------------------------------------------|-------------------------------------------------------------------------------------|-------------------------------------------------------------------------------------|
| 400 | 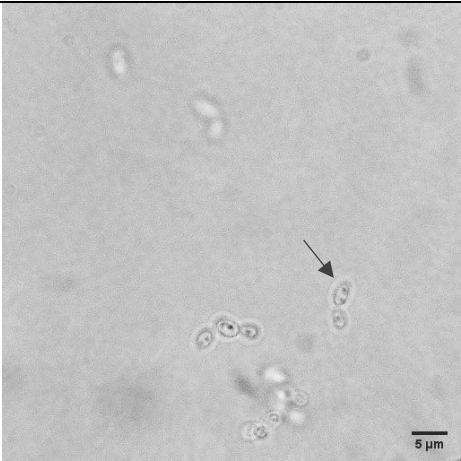 |  |  |  |
| 600 | no growth/cells                                                                   | no growth/cells                                                                    | no growth/cells                                                                     | no growth/cells                                                                     |

**Figure S2.** (Continued).

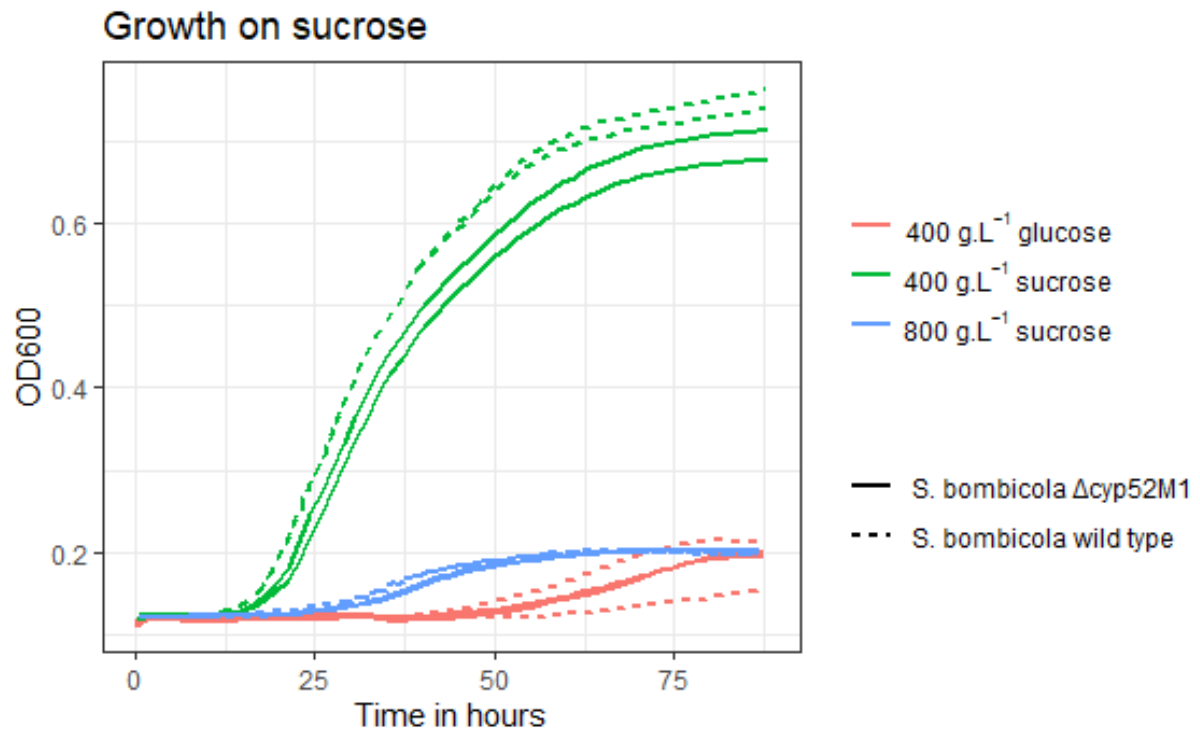

**Figure S3.** Growth curves (OD<sub>600</sub>) of a *S. bombicola* wild-type (dotted line) and  $\Delta$ cyp52M1 strain (full line) on SD CSM medium with 400 g·L<sup>-1</sup> glucose (red), 400 g·L<sup>-1</sup> sucrose (green) or 800 g·L<sup>-1</sup> sucrose (blue) (n=2).

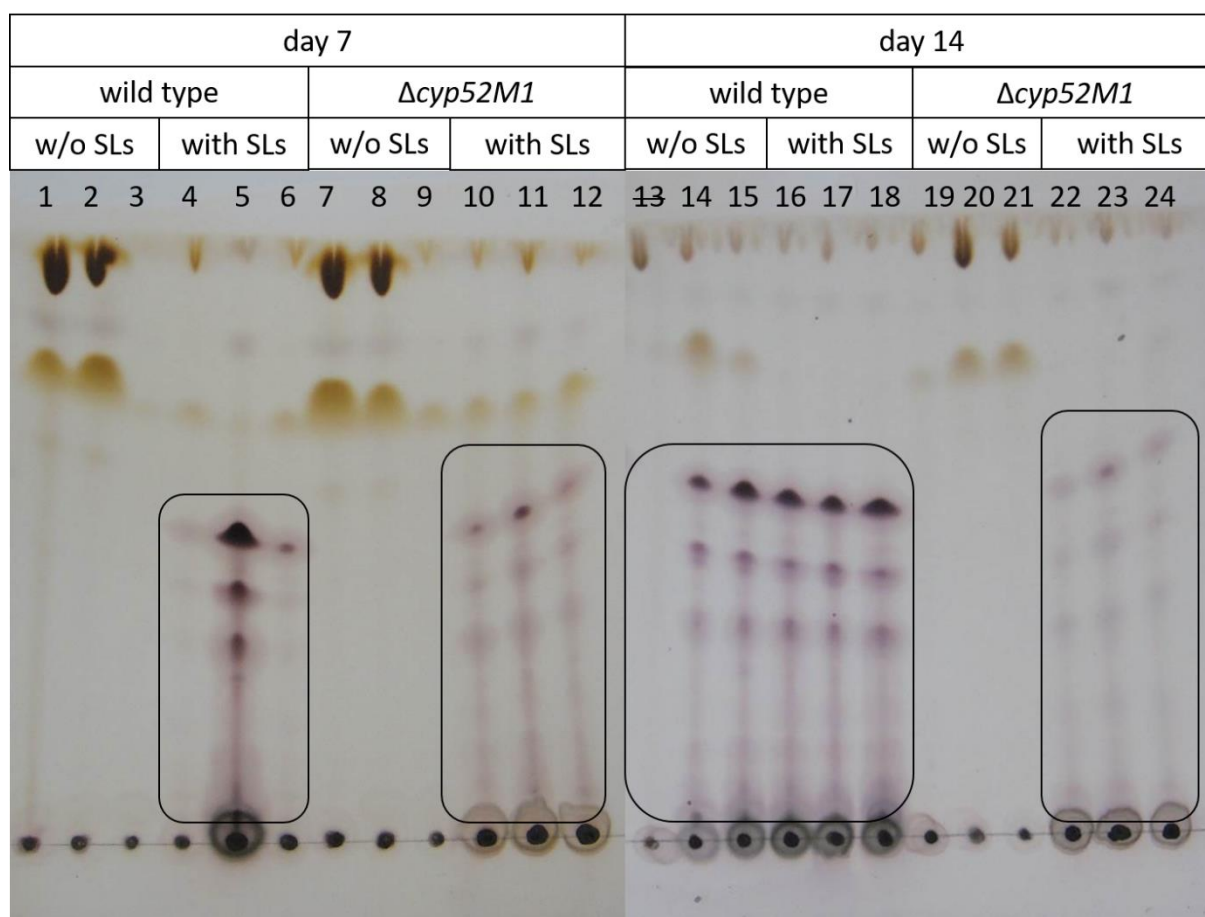

**Figure S4.** TLC analysis of cell culture broths at day 7 and day 14 of a *S. bombicola* wild-type and a  $\Delta cyp52M1$  strain on SD CSM medium with  $20 \text{ g}\cdot\text{L}^{-1}$  rapeseed oil as sole carbon source, with and without the addition of  $1 \text{ g}\cdot\text{L}^{-1}$  sophorolipids (SLs) ( $n=3$ ). Spots of SLs are purple and framed. Colony 1 of the wild type w/o SLs (lane 13) does not show SL production as this replicate was contaminated after 7 days.

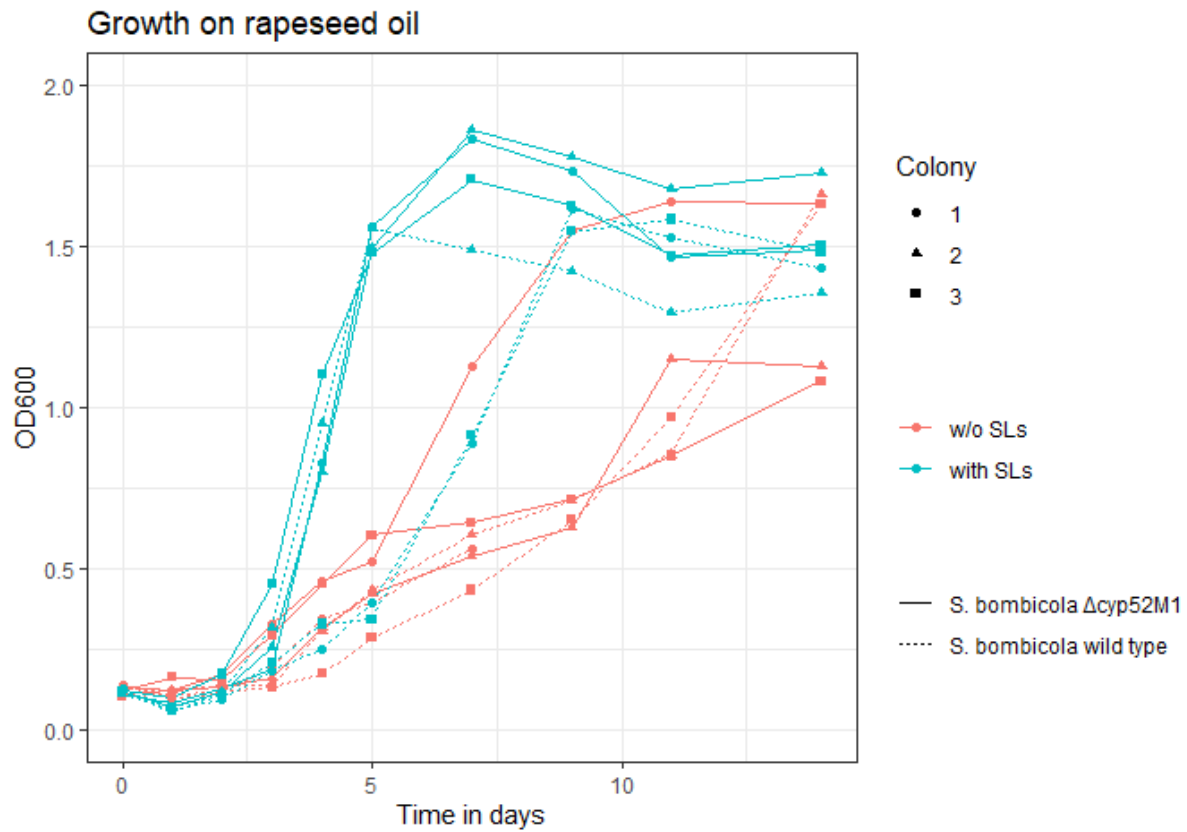

**Figure S5.** Growth curves (OD<sub>600</sub>) of a *S. bombicola* wild-type (dotted line) and  $\Delta cyp52M1$  strain (full line) on the SD CSM medium with 20 g·L<sup>-1</sup> rapeseed oil as the sole carbon source, with (blue) and without (red) the addition of 1 g·L<sup>-1</sup> SLs (14 days, n=3). Datapoints of colony 1 of the wild type on rapeseed oil w/o SLs after day 7 are not shown due to contamination of this replicate.

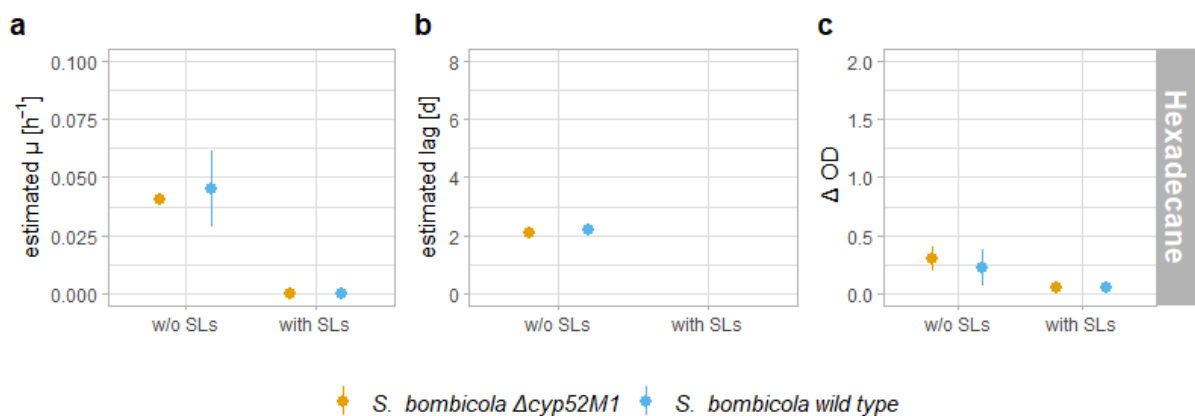

**Figure S6.** Scatterplots of the estimated growth parameters of a sophorolipid deficient *S. bombicola*  $\Delta cyp52M1$  strain (yellow dots, left) and a sophorolipid producing *S. bombicola* wild-type strain (blue dots, right) on hexadecane (n=3 or 2) in the presence ('with') or absence ('w/o') of 1 g·L<sup>-1</sup> wild-type sophorolipid mixture. The depicted error bars represent the standard deviation. **(a)** The estimated growth rate  $\mu$  [h<sup>-1</sup>], **(b)** the estimated duration of the lag phase [d] (cultures that lagged till the end of the experiment, are not depicted on the plot) and **(c)** the  $\Delta OD$  (maximum measured OD<sub>600</sub> value minus value at  $t_0$ ) at day 7.

**Table S1.** Influence of pH on the solubility [ $\text{g}\cdot\text{L}^{-1}$ ] of different forms of SLs. The solubility of purified lactonic and acidic SLs was determined in buffered ( $\text{KH}_2\text{PO}_4/\text{K}_2\text{HPO}_4$ ) aqueous solutions set at pH values of 3, 5, 7, and 8.5 with HCl and NaOH respectively. Minor amounts of the respective SLs were added until the products could not be solubilised anymore and precipitation occurred. When this occurred, the solutions were placed at 30 °C and more SLs were added to saturation if this slight heating again resulted in disappearance of the precipitate. This was performed on an analytical balance in order to determine the amount of product that could be solubilised at a certain pH.

| pH                                                                      | 3  | 5  | 7   | 8.5 |
|-------------------------------------------------------------------------|----|----|-----|-----|
| Acidic non-acetylated SLs solubilised [ $\text{g}\cdot\text{L}^{-1}$ ]  | 75 | 93 | 187 | 185 |
| Lactonic di-acetylated SLs solubilised [ $\text{g}\cdot\text{L}^{-1}$ ] | 25 | 42 | 69  | 136 |



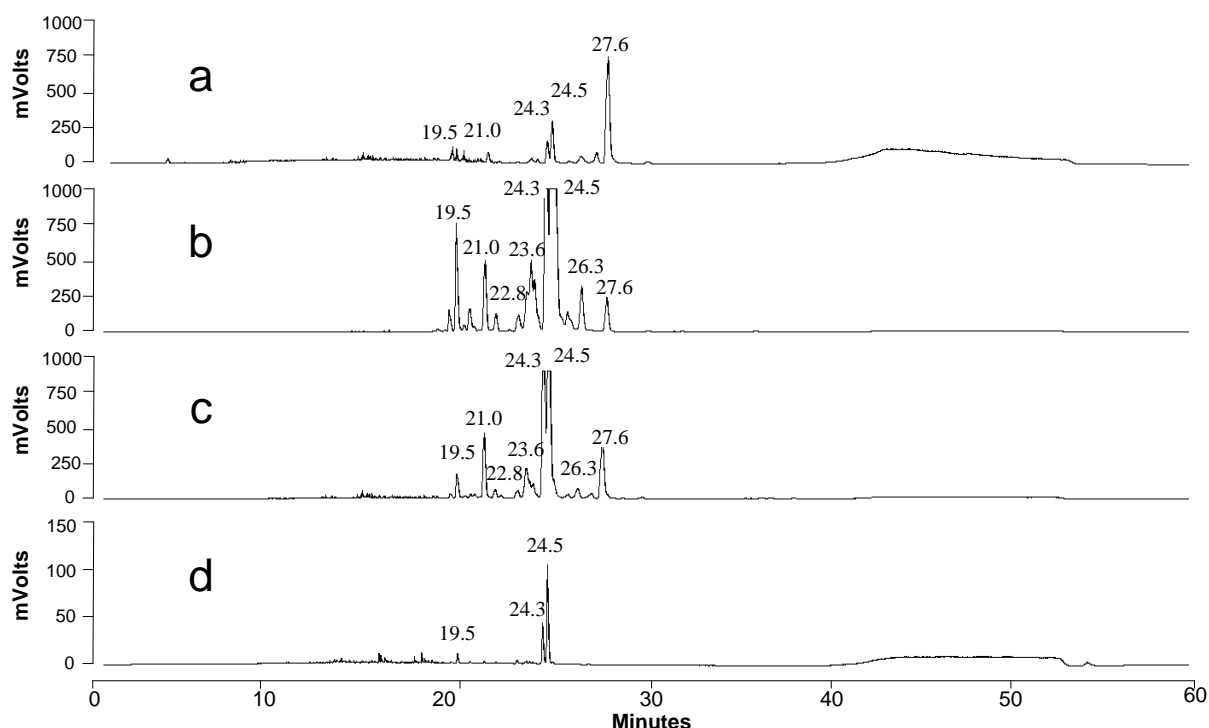

**Figure S7.** HPLC-ELSD chromatograms of samples from a *S. bombicola* culture on the SL medium with di-acetylated lactonic SLs (27.6 min) as the sole carbon source taken after **(a)** 1 day, **(b)** 8 days, **(c)** 18 days, and **(d)** 30 days of cultivation. Identification of the major peaks detected are listed in the table below.

**Table S2.** Identification of the major peaks detected in Figure S7 after HPLC-MS analysis. The detected masses ( $m/z$ ) correspond to the  $[M-H]^-$  adduct of the identified molecules. The most prominent ones are framed. Several peaks per unique  $m/z$  are detected at different retention times, because terminal ( $\omega$ ) and subterminal ( $\omega-1$ ) hydroxylated intermediates correspond to the same MW, but elute differently. The same is true for mono-acetylated derivatives, which can carry the acetyl group on the internal or external glucose moiety.

| retention time | $m/z$       | identity           | acetylation    |
|----------------|-------------|--------------------|----------------|
| 19.0           | 619         | acidic SL          | C18:2 non      |
| <b>19.5</b>    | 621         | acidic SL          | C18:1 non      |
| 20.2           | 623         | acidic SL          | C18:0 non      |
| <b>21.0</b>    | 663         | acidic SL          | C18:1 mono     |
| 21.6           | 663         | acidic SL          | C18:1 mono     |
| 22.8           | 603/663     | lactonic/acidic SL | C18:1 non/mono |
| <b>23.6</b>    | 705         | acidic SL          | C18:1 di       |
| 23.7           | 643 and 703 | lactonic/acidic SL | C18:2 mono/di  |
| <b>24.3</b>    | 645 and 705 | lactonic/acidic SL | C18:1 mono/di  |
| <b>24.5</b>    | 645         | lactonic SL        | C18:1 mono     |
| <b>26.3</b>    | 647 and 707 | lactonic/acidic SL | C18:0 mono/di  |
| 27.0           | 687         | lactonic SL        | C18:1 di       |
| <b>27.6</b>    | 687         | lactonic SL        | C18:1 di       |

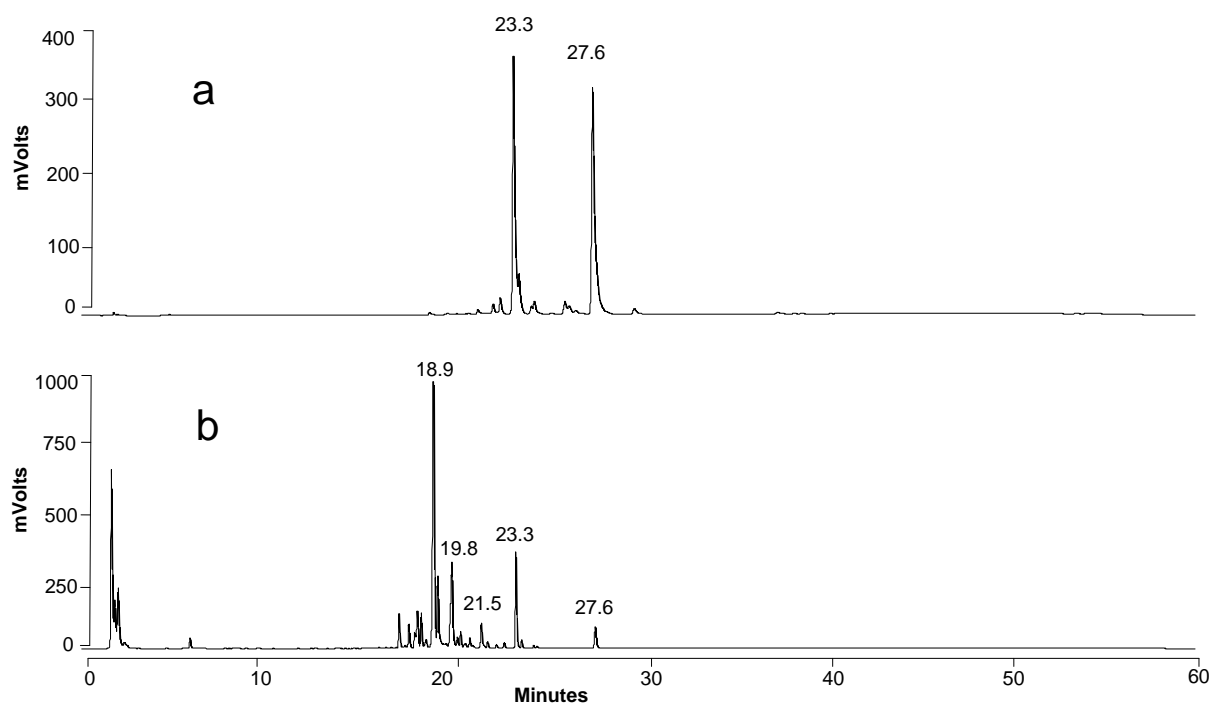

**Figure S8.** HPLC-ELSD chromatograms of samples from an extracellular activity assay with a *S. bombicola*  $\Delta sble$  strain (unconcentrated secretome) incubated with di-acetylated lactonic SLs (27.6 min) after **(a)** 16 days and **(b)** 32 days of incubation. Because this  $\Delta sble$  strain produces (high amounts) of (di-acetylated) acidic SLs (peak at 23.3 min), which are well water soluble, removal of the cells from the culture medium does not lead to removal of these SLs. These were therefore present in the assay from the beginning of the experiment, making it harder to assess if ring opening of lactonic SLs also occurs in the absence of the SBLE enzyme, but ring-opening can be concluded as the ratio between the acidic (23.3 min) and lactonic (27.6 min) SLs clearly increased.

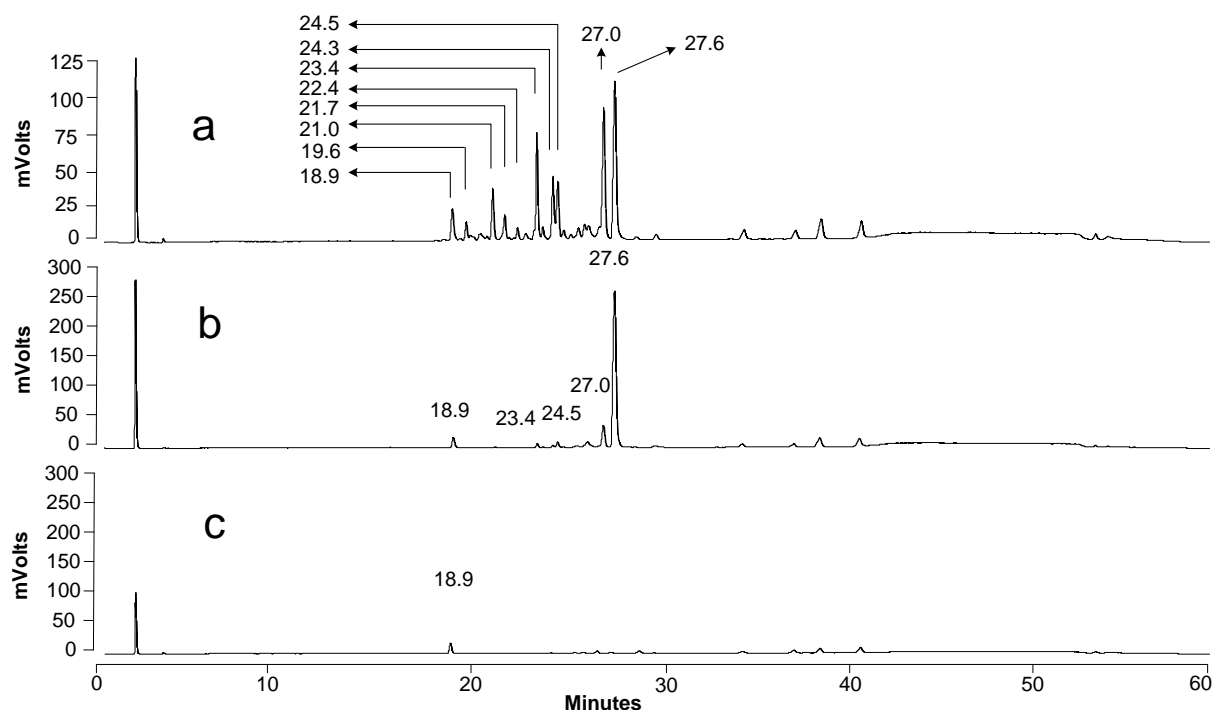

**Figure S9.** HPLC-ELSD chromatograms of **(a)** an enzyme assay of the wild-type lysate and di-acetylated lactonic SLs (27.6 min) after 6 days of incubation. **(b)** and **(c)** correspond to the controls for SLs and the lysate respectively. The peak at 18.9 minutes corresponds to an internal standard (C12:0-OH). Identification of the major peaks detected are listed in the table below.

**Table S3.** Identification of the major peaks detected in Figure S9 after HPLC-MS analysis. The detected masses ( $m/z$ ) correspond to the  $[M-H]^-$  adduct of the identified molecules. The most prominent ones are framed.

| retention time | $m/z$       | identity                | acetylation   |
|----------------|-------------|-------------------------|---------------|
| 18.9           | 216         | hydroxylated fatty acid | C12:0         |
| <u>19.6</u>    | 621         | acidic SL               | C18:1 non     |
| 20.4           | 637         | acidic SL               | C16:0 mono    |
| 20.8           | 623         | acidic SL               | C18:0 non     |
| <u>21.0</u>    | 663         | acidic SL               | C18:1 mono    |
| <u>21.7</u>    | 663         | acidic SL               | C18:1 mono    |
| 22.4           | 665         | acidic SL               | C18:0 mono    |
| <u>23.4</u>    | 645 and 705 | lactonic/acidic SL      | C18:1 mono/di |
| 23.8           | 645         | lactonic SL             | C18:1 mono    |
| <u>24.3</u>    | 645 and 705 | lactonic/acidic SL      | C18:1 mono/di |
| <u>24.5</u>    | 645         | lactonic SL             | C18:1 mono    |
| 26.24          | 647         | lactonic SL             | C18:0 mono    |
| <u>27.0</u>    | 687         | lactonic SL             | C18:1 di      |
| <u>27.6</u>    | 687         | lactonic SL             | C18:1 di      |
| 38.9           | 255         | fatty acid              | C16:0         |
| 41.0           | 283         | fatty acid              | C18:0         |
